# Supplementary material for: How representative are instantaneous evaporative fraction measurements of daytime fluxes?
Source: Copernicus journal article supplement (doi:10.5194/hess-17-3913-2013), 2013-10-15
Supplement: Supplementary file 1 [file hess-17-3913-2013-supplement.pdf]

# Supplementary material

## How representative are instantaneous evaporative fraction measurements for daytime fluxes?

**Jian Peng<sup>a,b,c,\*</sup>, Michael Borsche<sup>a</sup>, Yuanbo Liu<sup>c</sup>, Alexander Loew<sup>a</sup>**

<sup>a</sup> Max-Planck-Institute for Meteorology, KlimaCampus, 20146 Hamburg, Germany

<sup>b</sup> International Max Planck Research School on Earth System Modelling, 20146 Hamburg, Germany

<sup>c</sup> State Key Laboratory of Lake Science and Environment, Nanjing Institute of Geography and Limnology, Chinese Academy of Sciences, Nanjing 210008, China

\*Corresponding author. Tel.: +49-(0)40-41173-542

E-mail addresses: jian.peng@zmaw.de

# Supplementary material Fig. 1

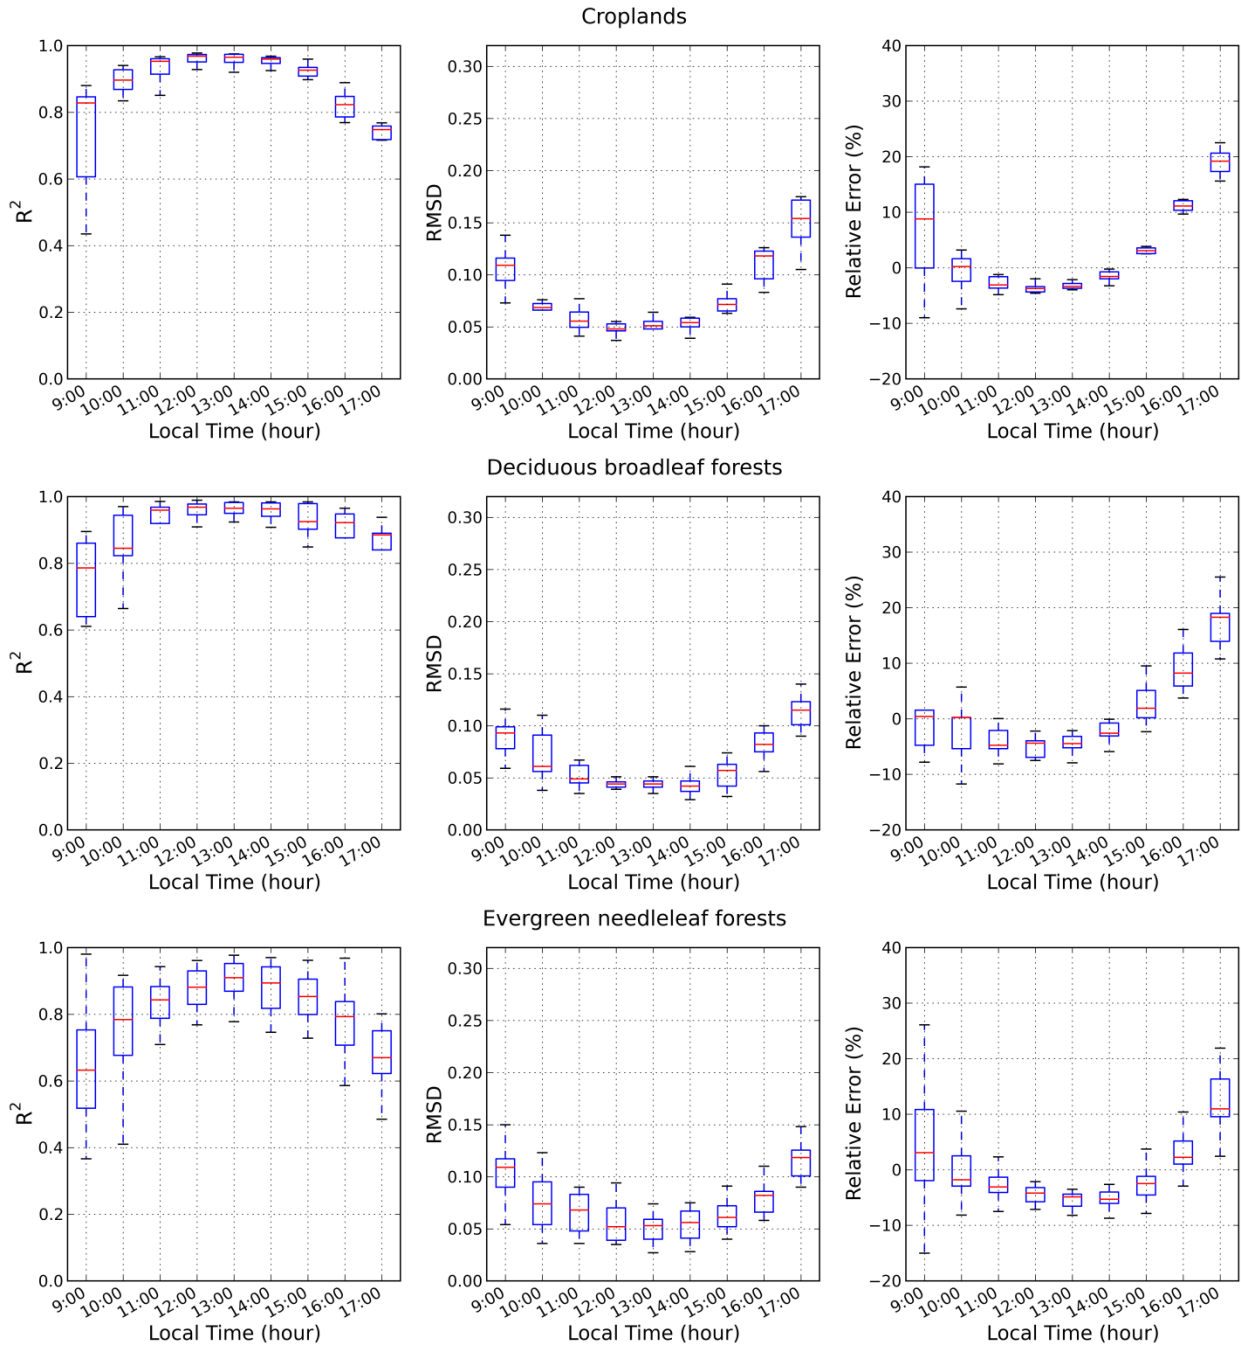

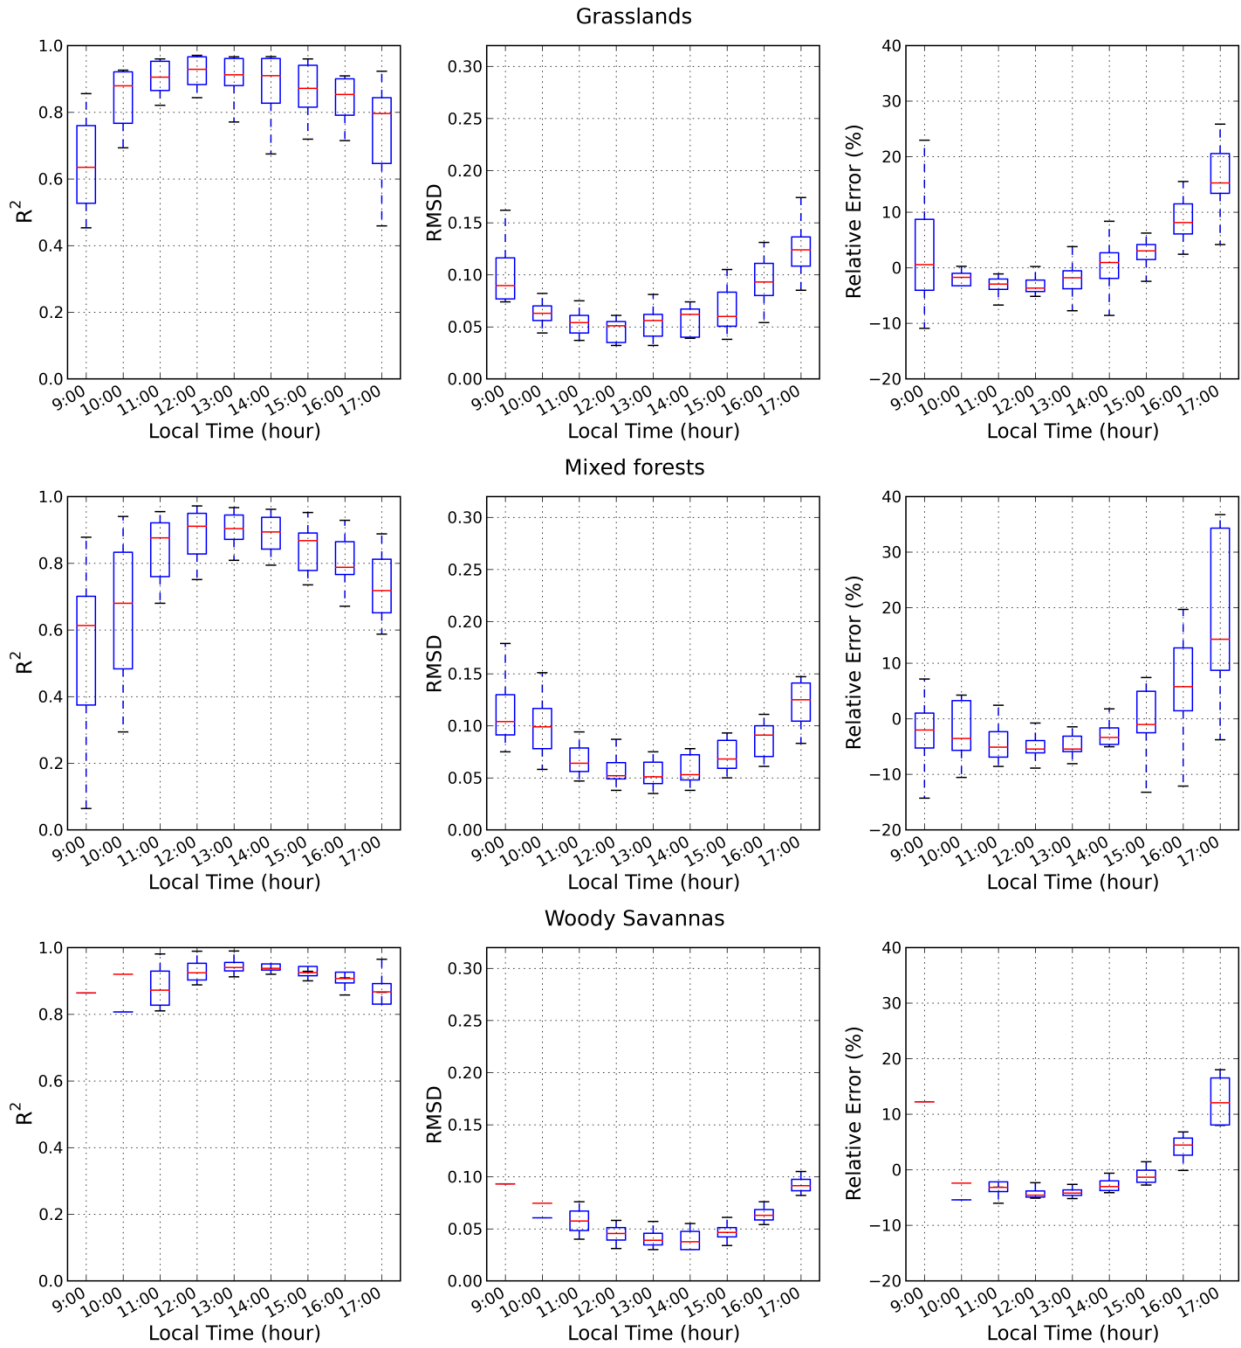

### Savannas

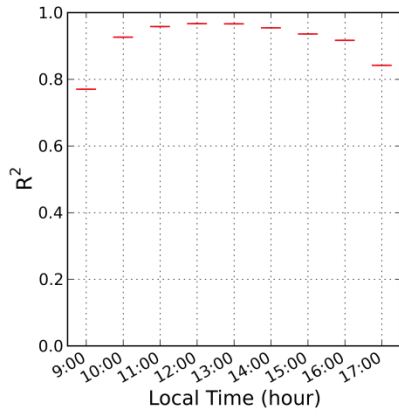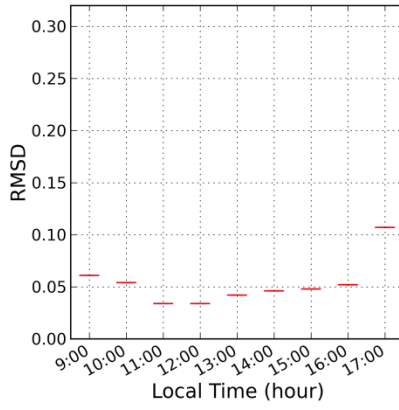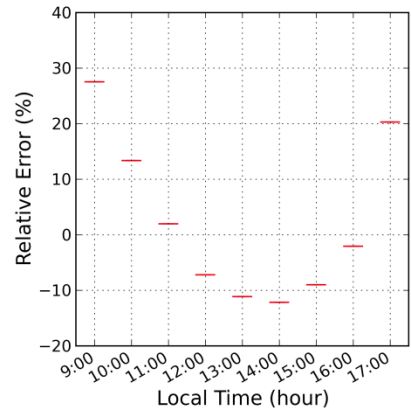

### Open shrublands

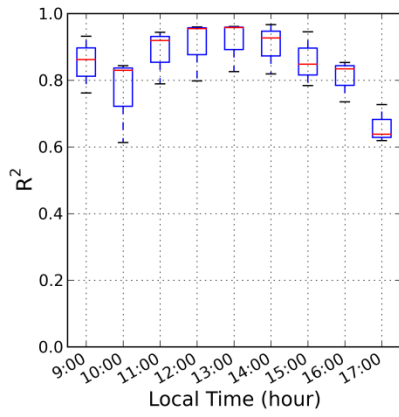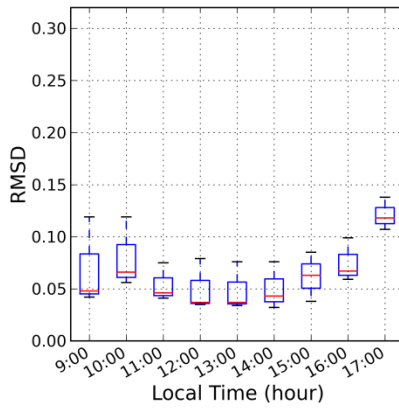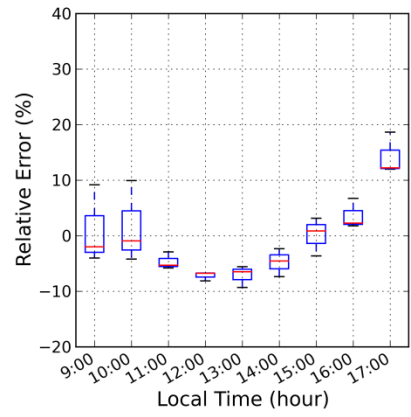

### Closed shrublands

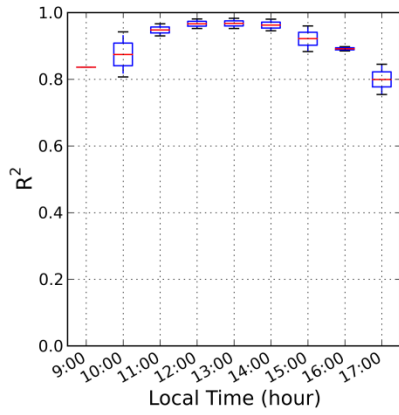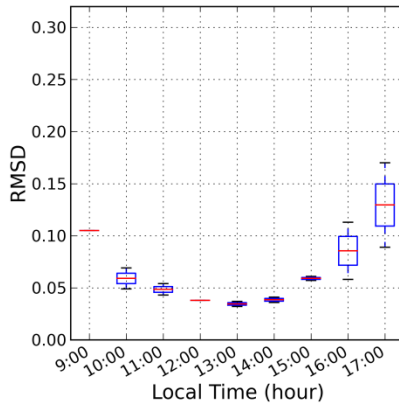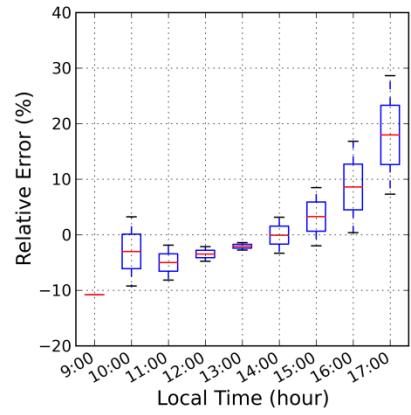

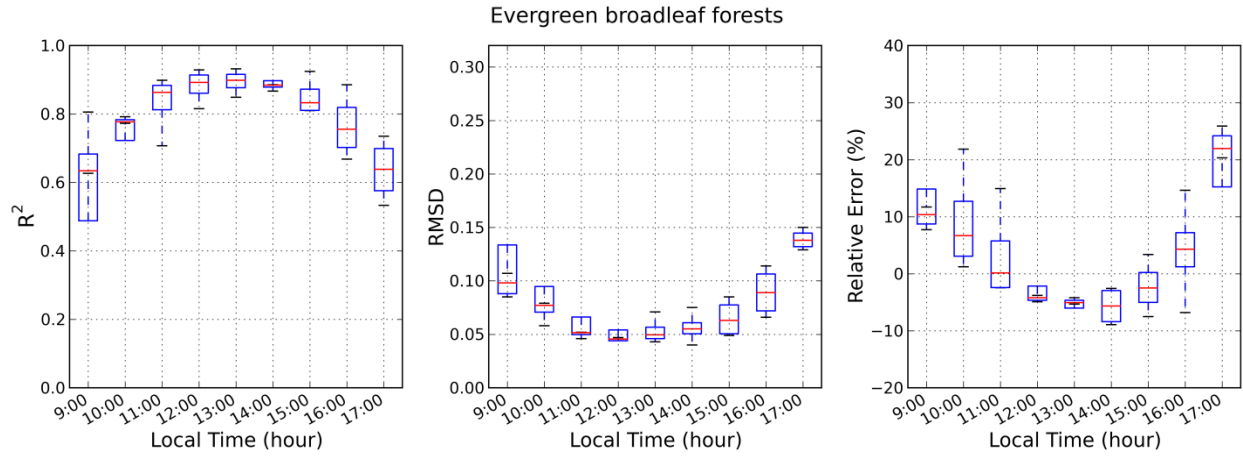

Box plots of statistical results for the comparisons between instantaneous EF at different time of daytime and daytime EF for different biome types under clear sky conditions.
